# Supplementary figures and images for: Identification and functional characterization of muscle satellite cells in Drosophila
Source: eLife journal article supplement (doi:10.7554/elife.30107), 2017-10-26

Figure 1 Supplement 1

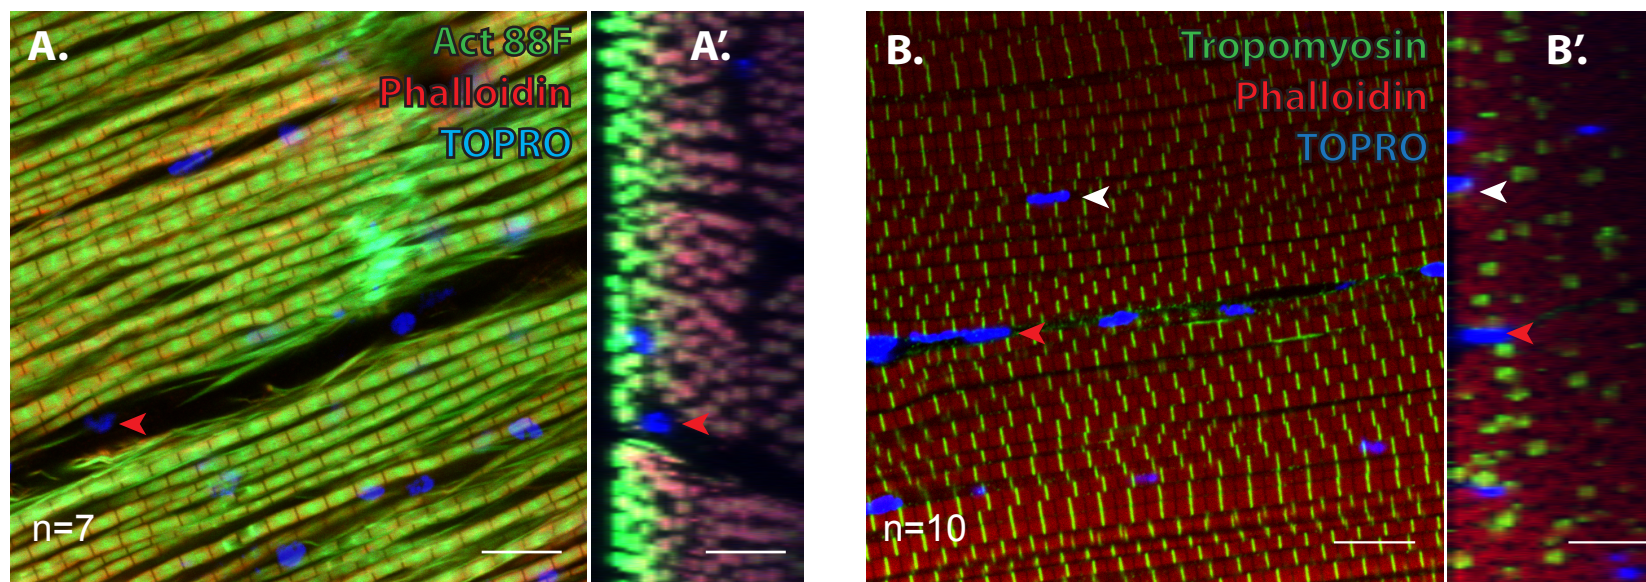

Supplement: supp [file elife_poa_e30107_Figure1_figure_supplement1.pdf › elife_poa_e30107_Figure1_figure_supplement1.pdf]

Figure 2 supplement

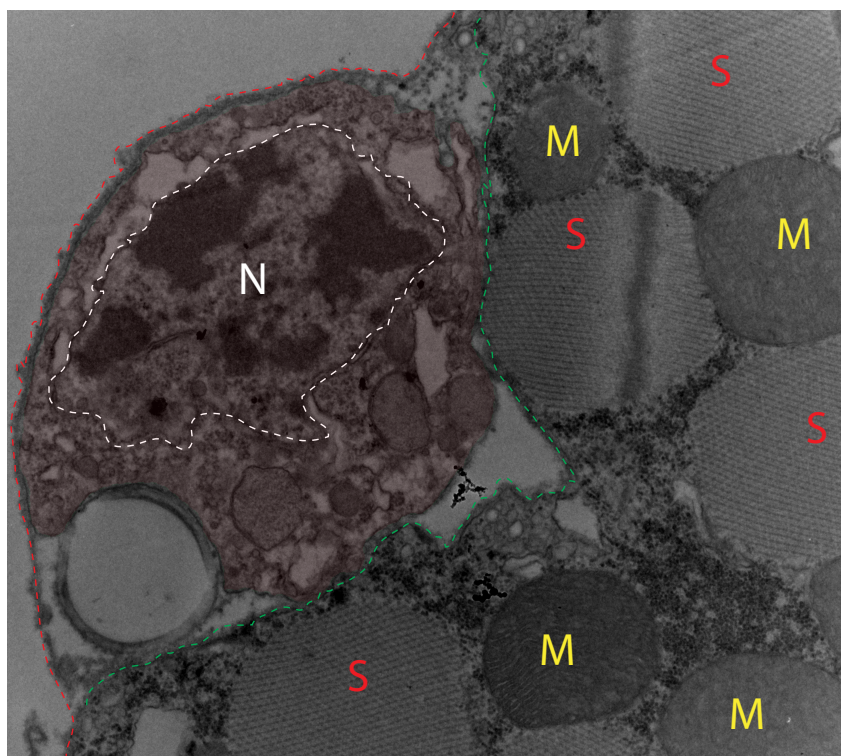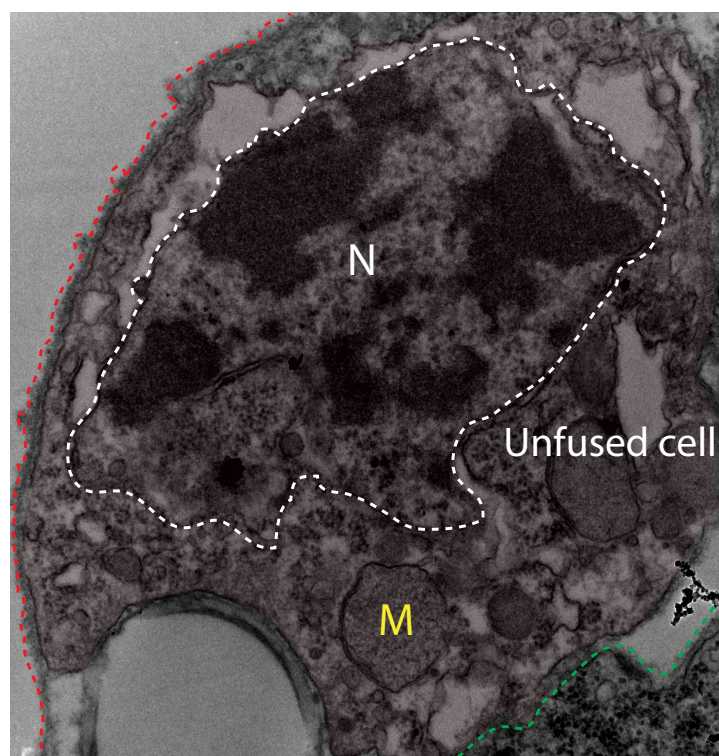

Supplement: supp [file elife_poa_e30107_Figure_2_figure_supplement_1.pdf › elife_poa_e30107_Figure_2_figure_supplement_1.pdf]

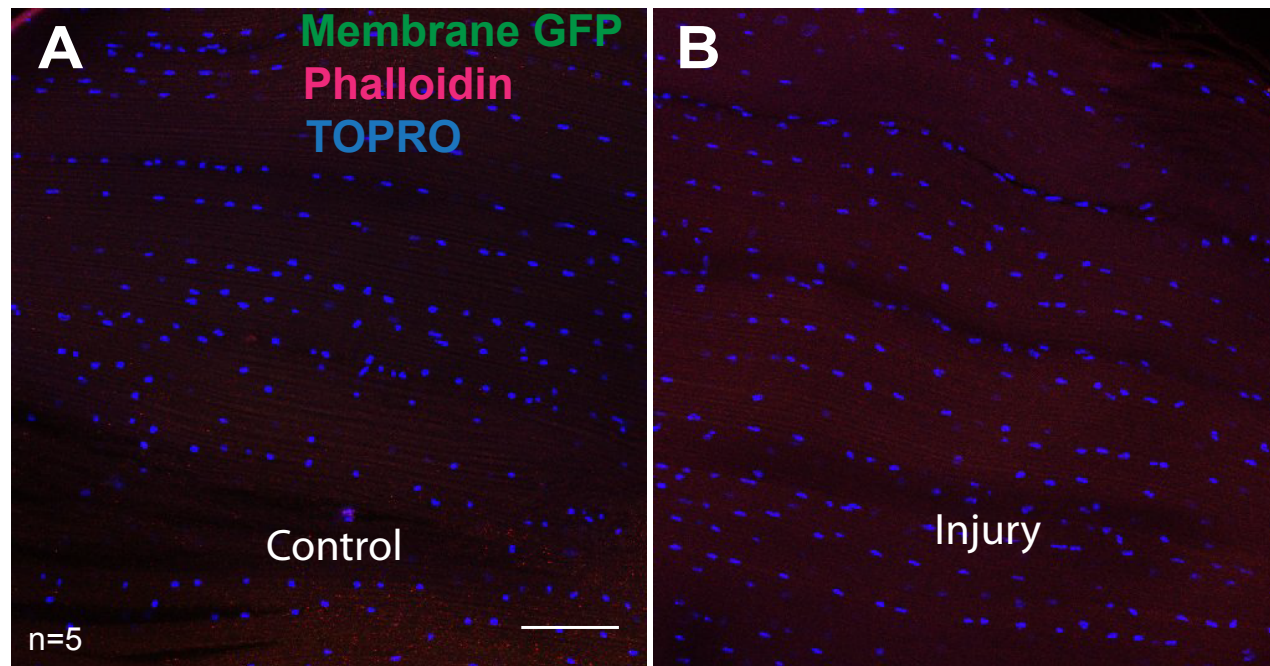

Supplement: supp [file elife_poa_e30107_Figure_3_figure_supplement_1.pdf › elife_poa_e30107_Figure_3_figure_supplement_1.pdf]
